# Supplementary material
Source: PubMed Central journal article supplement (PMC10240204)
Supplement: EMBR-24-e56282-s002.pdf [file EMBR-24-e56282-s002.pdf]

# LINC00493-encoded microprotein SMIM26 exerts antimetastatic activity in renal cell carcinoma

Kun Meng, Shaohua Lu, Yu-ying Li, Li-ling Hu, Jing Zhang, Yun Cao, Yang Wang, Chris Zhiyi Zhang, and Qing-Yu He  
DOI: 10.15252/embr.202256282

Corresponding author(s): Chris Zhiyi Zhang (Zhangzy@jnu.edu.cn) , Qing-Yu He (tqyhe@email.jnu.edu.cn), Yang Wang (wangyang0507@jnu.edu.cn), Chris Zhiyi Zhang (Zhangzy@jnu.edu.cn)

---

## Review Timeline:

|                     |             |
|---------------------|-------------|
| Submission Date:    | 12th Oct 22 |
| Editorial Decision: | 8th Nov 22  |
| Revision Received:  | 19th Feb 23 |
| Editorial Decision: | 6th Mar 23  |
| Revision Received:  | 8th Mar 23  |
| Accepted:           | 17th Mar 23 |

---

Editor: Achim Breiling

## Transaction Report:

(Note: With the exception of the correction of typographical or spelling errors that could be a source of ambiguity, letters and reports are not edited. Depending on transfer agreements, referee reports obtained elsewhere may or may not be included in this compilation. Referee reports are anonymous unless the Referee chooses to sign their reports.)

Dear Dr. Zhang,

Thank you for the transfer of your research manuscript to EMBO reports. I have now received the reports from the three referees that were asked to evaluate your study, which can be found at the end of this email.

As you will see, the referees think that these findings are of interest. However, they have several comments, concerns, and suggestions, indicating that a major revision of the manuscript is necessary to allow publication of the study in EMBO reports. As the reports are below, and all the referee concerns need to be addressed, I will not detail them here.

Given the constructive referee comments, we would like to invite you to revise your manuscript with the understanding that all referee concerns must be addressed in the revised manuscript and in a detailed point-by-point response. Acceptance of your manuscript will depend on a positive outcome of a second round of review. It is EMBO reports policy to allow a single round of revision only and acceptance of the manuscript will therefore depend on the completeness of your responses included in the next, final version of the manuscript.

Revised manuscripts should be submitted within three months of a request for revision. Please contact me to discuss the revision (also by video chat) if you have questions or comments regarding the revision, or should you need additional time.

When submitting your revised manuscript, please also carefully review the instructions that follow below.

PLEASE NOTE THAT upon resubmission revised manuscripts are subjected to an initial quality control prior to exposition to re-review. Upon failure in the initial quality control, the manuscripts are sent back to the authors, which may lead to delays. Frequent reasons for such a failure are the lack of the data availability section (please see below) and the presence of statistics based on  $n=2$  (the authors are then asked to present scatter plots or provide more data points).

When submitting your revised manuscript, we will require:

1) a .docx formatted version of the final manuscript text (including legends for main figures, EV figures and tables), but without the figures included. Figure legends should be compiled at the end of the manuscript text.

2) individual production quality figure files as .eps, .tif, .jpg (one file per figure), of main figures (up to 8) and EV figures. Please upload these as separate, individual files upon re-submission.

The Expanded View format, which will be displayed in the main HTML of the paper in a collapsible format, has replaced the Supplementary information. You can submit up to 5 images as Expanded View. Please follow the nomenclature Figure EV1, Figure EV2 etc. The figure legend for these should be included in the main manuscript document file in a section called Expanded View Figure Legends after the main Figure Legends section. Additional Supplementary material should be supplied as a single pdf file labeled Appendix. The Appendix should have page numbers and needs to include a table of content on the first page (with page numbers) and legends for all content. Please follow the nomenclature Appendix Figure Sx, Appendix Table Sx etc. throughout the text, and also label the figures and tables according to this nomenclature.

For more details, please refer to our guide to authors:

<http://www.embopress.org/page/journal/14693178/authorguide#manuscriptpreparation>

Please consult our guide for figure preparation:

[http://wol-prod-cdn.literatumonline.com/pb-assets/embo-site/EMBOPress\\_Figure\\_Guidelines\\_061115-1561436025777.pdf](http://wol-prod-cdn.literatumonline.com/pb-assets/embo-site/EMBOPress_Figure_Guidelines_061115-1561436025777.pdf)

See also the guidelines for figure legend preparation:

<https://www.embopress.org/page/journal/14693178/authorguide#figureformat>

3) a complete author checklist, which you can download from our author guidelines

(<https://www.embopress.org/page/journal/14693178/authorguide>). Please insert page numbers in the checklist to indicate where the requested information can be found in the manuscript. The completed author checklist will also be part of the RPF.

Please also follow our guidelines for the use of living organisms, and the respective reporting guidelines:

<http://www.embopress.org/page/journal/14693178/authorguide#livingorganisms>

4) that primary datasets produced in this study (e.g. RNA-seq, ChIP-seq, structural and array data) are deposited in an appropriate public database. If no primary datasets have been deposited, please also state this in a dedicated section (e.g. 'No primary datasets have been generated and deposited'), see below.

See also: <http://embor.embopress.org/authorguide#datadeposition>

Please remember to provide a reviewer password if the datasets are not yet public.

The accession numbers and database should be listed in a formal "Data Availability" section (placed after Materials & Methods) that follows the model below. This is now mandatory (like the COI statement). Please note that the Data Availability Section is restricted to new primary data that are part of this study. This section is mandatory. As indicated above, if no primary datasets have been deposited, please state this in this section

#### # Data availability

The datasets produced in this study are available in the following databases:

- RNA-Seq data: Gene Expression Omnibus GSE46843 (<https://www.ncbi.nlm.nih.gov/geo/query/acc.cgi?acc=GSE46843>)
- [data type]: [name of the resource] [accession number/identifier/doi] ([URL or identifiers.org/DATABASE:ACCESSION])

\*\*\* Note - All links should resolve to a page where the data can be accessed. \*\*\*

Moreover, I have these editorial requests:

6) We now request the publication of original source data with the aim of making primary data more accessible and transparent to the reader. Our source data coordinator will contact you to discuss which figure panels we would need source data for and will also provide you with helpful tips on how to upload and organize the files.

7) Our journal encourages inclusion of \*data citations in the reference list\* to directly cite datasets that were re-used and obtained from public databases. Data citations in the article text are distinct from normal bibliographical citations and should directly link to the database records from which the data can be accessed. In the main text, data citations are formatted as follows: "Data ref: Smith et al, 2001" or "Data ref: NCBI Sequence Read Archive PRJNA342805, 2017". In the Reference list, data citations must be labeled with "[DATASET]". A data reference must provide the database name, accession number/identifiers and a resolvable link to the landing page from which the data can be accessed at the end of the reference. Further instructions are available at: <http://www.embopress.org/page/journal/14693178/authorguide#referencesformat>

8) Regarding data quantification and statistics, please make sure that the number "n" for how many independent experiments were performed, their nature (biological versus technical replicates), the bars and error bars (e.g. SEM, SD) and the test used to calculate p-values is indicated in the respective figure legends (also for potential EV figures and all those in the final Appendix). Please also check that all the p-values are explained in the legend, and that these fit to those shown in the figure. Please provide statistical testing where applicable. Please avoid the phrase 'independent experiment', but clearly state if these were biological or technical replicates. Please also indicate (e.g. with n.s.) if testing was performed, but the differences are not significant. In case n=2, please show the data as separate datapoints without error bars and statistics. See also: <http://www.embopress.org/page/journal/14693178/authorguide#statisticalanalysis>

9) Please also note our reference format:

<http://www.embopress.org/page/journal/14693178/authorguide#referencesformat>

10) Please add scale bars of similar style and thickness to all the microscopic images, using clearly visible black or white bars (depending on the background). Please place these in the lower right corner of the images themselves. Please do not write on or near the bars in the image but define the size in the respective figure legend.

11) We updated our journal's competing interests policy in January 2022 and request authors to consider both actual and perceived competing interests. Please review the policy <https://www.embopress.org/competing-interests> and update your competing interests if necessary. Please name this section 'Disclosure and Competing Interests Statement' and put it after the Acknowledgements section.

12) We now use CRediT to specify the contributions of each author in the journal submission system. CRediT replaces the author contribution section. Please use the free text box to provide more detailed descriptions. See also guide to authors: <https://www.embopress.org/page/journal/14693178/authorguide#authorshipguidelines>

13) Please add up to 5 keywords to the title page (below the abstract).

14) Please order the manuscript sections like this, using these names:

Title page - Abstract - Keywords - Introduction - Results - Discussion - Materials and Methods - Data availability section - Acknowledgements (including funding information) - Disclosure and Competing Interests Statement - References - Figure legends - Expanded View Figure legends

15) Please note that all corresponding authors are required to supply an ORCID ID for their name upon submission of a revised

manuscript. Please find instructions on how to link the ORCID ID to the account in our manuscript tracking system in our Author guidelines: <http://www.embopress.org/page/journal/14693178/authorguide#authorshipguidelines>

I look forward to seeing a revised version of your manuscript when it is ready. Please let me know if you have questions or comments regarding the revision.

Please use this link to submit your revision: <https://embor.msubmit.net/cgi-bin/main.plex>

Yours sincerely,

Achim Breiling  
Senior Editor  
EMBO Reports

-----  
Referee #1:

Although the LINC00493-encoded SMIM26 has been identified by the authors and two other labs, its functions in cells remain unclear. In this manuscript, the authors functionally characterize the microprotein and establish its antimetastatic role in ccRCC. They showed that SMIM26 is a mitochondrial outer membrane protein, which is downregulated in clear cell renal cell carcinoma (ccRCC) and correlated with poor overall survival. Knockdown of LINC00493-binding protein PABPC4 reduced the expression of SMIM26. They further demonstrated that SMIM26, but not LINC00493, suppresses ccRCC growth and metastatic lung colonization.

They showed that SMIM26 interacted with acylglycerol kinase (AGK) and glutathione transport regulator SLC25A11 through its N-terminal. SMIM26-expressing cells had increased mitoGSH level, basal and maximal mitochondrial respiration rate, which could be markedly inhibited by SLC25A11 siRNAs. Moreover, SMIM26 suppresses the phosphorylation of AKT at Ser473 in ccRCC cells. Overexpression of SMIM26 increased the level of mitochondrial AGK. The authors suggested that SMIM26 retains AGK in mitochondria to inhibit its capability of catalyzing AKT phosphorylation, and consequently restricts ccRCC metastasis. Interestingly, SMIM26 promoted the interaction of AGK and SLC25A11.

This manuscript contains a lot of interesting data and their experiments are technically sound. However, in several places, I am afraid their interpretation/conclusions lack enough evidence. The underlying mechanism of anti-metastatic activity of SMIM26 in ccRCC needs to be developed further.

Major points:

1. The authors showed that N-terminal of SMIM26 interacted with both AGK and SLC25A11. They suggested that SMIM26 forms a protein complex with AGK and SLC25A11 in mitochondria and promotes the interaction between AGK and SLC25A11. Since both AGK and SLC25A11 bind the same N-terminal of SMIM26, they might associate with SMIM26 in a competitive manner. How does SMIM26 promote the AGK and SLC25A11 interaction deserve to be studied further. To check whether SMIM26 can form a dimer or oligomer, or map the minimal motifs in N-terminal domain of SMIM26 required to interact with AGK and SLC25A11 might be helpful to understand this point.
2. The authors suggest that RNA binding protein PABPC4 regulates SMIM26 expression. Although the levels of PABPC4 in ccRCC are lower than the adjacent normal tissues, however, the authors did not show that PABPC4 expression is lower in ACSN than that in HEK293 cells. In Fig. 3C, the authors have examined the levels of PABPC4 in these two cell lines individually, they need to run the samples in the same gel to compare the levels of PABPC4 in these cell lines directly.
3. The authors claimed that "Blockage on the interaction of SMIM26-SLC25A11 by siRNAs dramatically abrogated the SMIM26-mediated suppression of cell migration and invasion (Fig. 5P and Fig. S6G)". Based on the method they used (siRNA to knockdown SLC25A11), the authors did not provide direct evidence to support that SMIM26 plays a regulative role in mitochondrial function and cell migration by binding to SLC25A11. Rescue experiment with full length and mutant SLC25A11 not binding with SMIM26 might be helpful.
4. Based on the proposed model that SMIM26 retains AGK in mitochondria to inhibit its capability of catalyzing AKT phosphorylation, while overexpression of AGK in SMIM26-expression cells rescued the AKT phosphorylation, the authors are recommended to examine whether the levels of AGK in cytoplasm (outside of mitochondria) and PTEN phosphorylation are increased when AGK is overexpressed in SMIM26-expression ccRCC cells.

Minor points:

- 1, In Fig. 1F, The quantification result was not provided.
- 2, In Fig. 1H & 1J, Fig. 3C & 3E & 3G, etc, The western blots lack molecular weight labels.
- 3, SMIM26-mut-flag (start codon ATG was mutated to GGA and stop codon TAA was mutated to GCT) plasmids. Why the stop codon in the SMIM26-mut-Flag is also mutated? Is it necessary?

- 4, In Fig. 4E, how is the intensity of F-actin fluorescence quantified? The method part did not give a detailed description.
- 5, In Fig. 5I, The signals of immunoprecipitated Mut1 & Mut2 are much lower than the Full-length SMIM26. A better representative image is required.

-----  
Referee #2:

Declaration: I was involved in a previous evaluation process of this manuscript for another journal and provide my updated suggestions herein.

In the current manuscript Kun Meng and colleagues describe the expression and function of a small microprotein called SMIM26, which is encoded by the putative non-coding RNA LINC00493. The authors convincingly show that SMIM26 is expressed in a panel of human (cancer) cell lines. SMIM26 localizes to mitochondria and probably is inserted in the mitochondrial membrane. Using a custom-made anti-SMIM26 antibody that authors investigated the expression of this microprotein in a panel of normal and cancerous human tissues. They could detect a significant downregulation of SMIM26 protein, but not LINC00493 expression in kidney cancer (ccRCC). Since the expression of the SMIM26 microprotein and its host RNA showed a poor correlation in cells and tissues, the authors tried to identify post-transcriptional regulators of SMIM26. RNA pulldown and RIP assays revealed an interaction between LINC00493 and PABPC4 and knockdown of the latter reduced SMIM26 protein levels. Further cellular and molecular assays establish SMIM26 as an inhibitor of kidney cancer cell migration, invasion and metastasis potentially via its interaction with SLC2511 and AGK. These interactions enhance GSH import into mitochondria, decrease the fraction of AGK in the cytosol and thereby reduce AKT phosphorylation.

In summary, the authors performed a comprehensive panel of in vitro and in vivo experiments and could establish a critical function for a novel microprotein regulating cancer cell motility in a human cancer entity. Therefore, this study is relevant and important as it sheds light into a new and understudied fraction of the human proteome encoded by recently suggested non-coding transcripts.

However, before this manuscript can be accepted for publication, the authors need to address the following concerns:

Major concerns:

- 1) The authors identified 91 proteins that interact with LINC00493 (Figure 3) and decided to focus on PABPC4. Why? Was a potential impact of NCL on SMIM26 analysed? What about the most strongly enriched candidate? What is the name of this protein and was it functionally analysed?
- 2) The authors argue that PABPC4, via binding to LINC00493, regulates translation of SMIM26. Indeed, knockdown of PABPC4 decreases SMIM26 expression in two cell lines (Fig. 3C), seemingly without affecting RNA expression of LINC00493/SMIM26 (Fig. 3D). While this suggests a disturbed translation of SMIM26 upon PABPC4 depletion, it is also possible that SMIM26 protein turnover is altered. Thus, the authors should analyze microprotein stability (CHX treatments) in control and PABPC4-depleted cells.
- 3) The authors claim that the interaction between AGK and SMIM26 increases the amount of AGK in the mitochondria by preventing its transport to the cytosol. The data shown in Fig.6J are not really convincing nor consistent between both cell lines and lack the reverse (loss-of-function) experiment. Therefore, please provide a quantification of AGK protein levels in mitochondria and the cytosol in control and SMIM26 overexpressing cells normalized to COXIV and tubulin levels, respectively. Also, the authors should investigate AGK localization in LINC00493/SMIM26-depleted cells.
- 4) In Figures 6L, M, O the authors show that AGK overexpression can revert SMIM26 effects on AKT phosphorylation as well as cell migration, invasion, and OCR rates. According to their model (Fig.7), AKT is the key downstream factor in this pathway. Please show that the AGK-mediated reversion depends on AKT. For example, the authors could knockdown AKT or use an AKT inhibitor.

Minor concerns:

- 5) Overall survival analysis is presented in Figure 2C using a 30:70 sample split. Please repeat analysis using 50:50 (median split) and / or upper 25% vs. lower 25%.
- 6) The authors state that "We next performed RNA pulldown coupled with stable isotope labeling by amino acids in cell culture (SILAC) mass spectrometric analysis (RNA pulldown-SILAC-MS) to identify the post-transcriptional regulators of SMIM26". The authors still need to explain the rationale of the SILAC approach and the selection of the two cell lines in more detail. Why was a SILAC method chosen?
- 7) The authors developed an antibody against SMIM26 and performed IHC analyses in a large panel of tumor (T) and normal (N) tissues (see Fig.2B). Yet, in Figure 3G they limit their PABPC4-SMIM26 co-expression analysis to four T/N pairs only. The

authors should perform IHC analyses in order to detect PABPC4 in their TMA and perform correlation analyses. Alternatively, the authors should leverage the CPTAC data and perform the respective correlation analysis.

8) The authors suggest that SMIM26 overexpression prevents EMT given its impact on Vimentin (see Fig.4F). Is E-cadherin expression altered as well?

9) What is depicted in Fig.S7B? The figure is not intuitive and does not allow one to draw conclusions about pathway enrichment/depletion (statistics?). What are the individual lines/columns? Please provide a more convincing presentation of this KEGG pathway analysis.

10) Please provide patient sample information and ethical statement for analyses shown in Fig.2.

Further suggestions:

11) Please carefully check the manuscript and perform language editing, if needed.

12) In the discussion the authors mention that SMIM26 could be a target to treat cancers. However, SMIM26 is downregulated in cancers (see Figure 2). Thus, "target" might be misleading here. However, restoration of SMIM26 expression would be an option. Moreover, the authors might speculate about AGK inhibitors (alone or in combination with AKT inhibitors).

-----  
Referee #3:

In the paper entitled "Mitochondrial Microprotein SMIM26 Encoded by LINC00493 Exerts Antimetastatic Activity in Clear Cell Renal Cell Carcinoma" Meng and colleagues characterize a previously identified micropeptide derived from LINC00493 in ccRCC and show its localization at mitochondria. The paper is timely and research well-conceived, however I still have a few comments.

Major concerns:

- The effect on vimentin in 769-P is not convincing, thus rising the possibility of a cell line specific effect.
- Mouse experiment in Fig.4G is missing stats and "The Key control" (mutant control not producing SMIM26) to be able to claim that "SMIM26 and not LINC00493 suppresses ccRCC growth and metastasis".
- When testing different mutants of SMIM26 I am a bit surprised that the author missed again a key negative control: the protein missing the N-term that they claim is essential for binding to SLC25A11 and/or a fusion protein with a tag at the N-term, as such the protein should not be able to localize to the mitochondria anymore. Regarding this, has SMIM26 a mitochondrial localization signal?
- One major concern is that many experiments have been run on overexpression conditions. For instance, the complex between AGK and SCL25A11 should be probed in KD settings or in cells not expressing SMIM26, to be able to claim that SMIM is bridging these activities.
- There is no link between the in vivo phenotype and the identified protein partners of SMIM26. The co-IP could have been done on xenograft samples and/or immunohistochemistry for phosphor-AKT performed on mouse samples.

Minor:

- In the abstract the authors say: "Especially, the lncRNA-derived mitochondrial microproteins are rarely investigated." This is inaccurate. Actually, localization of many of these micropeptides at mitochondria was one of the first observations following their discovery and this even raised the concern that mito localization could be an artifact of their overexpression and/or of their tagging.
- Title of the first paragraph in the results section: "SMIM26 is a microprotein endogenously encoded by LINC00493 and localizes in mitochondria". It is not clear to me what endogenously means here.
- Last paragraph before discussion: "We then performed RNA-seq in ACHN cells to disclose the downstream pathway through which SMIM26 inhibits cell migration." Here it should be indicated that the RNAseq was run the overexpressing cells, as compared to the knock down mentioned afterwards, to avoid confusion.

## Responses to the reviewers' comments

### Referee #1:

Although the LINC00493-encoded SMIM26 has been identified by the authors and two other labs, its functions in cells remain unclear. In this manuscript, the authors functionally characterize the microprotein and establish its antimetastatic role in ccRCC. They showed that SMIM26 is a mitochondrial outer membrane protein, which is downregulated in clear cell renal cell carcinoma (ccRCC) and correlated with poor overall survival. Knockdown of LINC00493-binding protein PABPC4 reduced the expression of SMIM26. They further demonstrated that SMIM26, but not LINC00493, suppresses ccRCC growth and metastatic lung colonization.

They showed that SMIM26 interacted with acylglycerol kinase (AGK) and glutathione transport regulator SLC25A11 through its N-terminal. SMIM26-expressing cells had increased mitoGSH level, basal and maximal mitochondrial respiration rate, which could be markedly inhibited by SCL25A11 siRNAs. Moreover, SMIM26 suppresses the phosphorylation of AKT at Ser473 in ccRCC cells. Overexpression of SMIM26 increased the level of mitochondrial AGK. The authors suggested that SMIM26 retains AGK in mitochondria to inhibit its capability of catalyzing AKT phosphorylation, and consequently restricts ccRCC metastasis. Interestingly, SMIM26 promoted the interaction of AGK and SLC25A11.

This manuscript contains a lot of interesting data and their experiments are technically sound. However, in several places, I am afraid their interpretation/conclusions lack enough evidence. The underlying mechanism of anti-metastatic activity of SMIM26 in ccRCC needs develop further.

### Major points:

1. The authors showed that N-terminal of SMIM26 interacted with both AGK and SLC25A11. They suggested that SMIM26 forms a protein complex with AGK and SLC25A11 in mitochondria and promotes the interaction between AGK and SLC25A11. Since both AGK and SLC25A11 binds the same N-terminal of SMIM26, they might associate with SMIM26 in a competitive manner. How does SMIM26 promote the AGK and SLC25A11 interaction deserve to study further. To check whether SMIM26 can form dimer or oligomer, or map the minimal motifs in N-terminal domain of SMIM26 required to interact with AGK and SLC25A11 might be helpful to understand this point.

**Response:** Thank you for your constructive comments. According to the suggestions, we firstly examined whether SMIM26 formed dimer. The results of Native-PAGE using purified SMIM26-His recombinant protein did not present SMIM26 dimer (Fig. A-B below).

Next, we detected the minimal SMIM26 motifs required for the binding of AGK and SLC25A11. Plasmids encoding 1-13 aa (N1) or 14-35 aa (N2) of N-ter of SMIM26 protein were constructed (Fig. C-D below). The results of Co-IP indicated that SMIM26 interacted with AGK and SLC25A11 through N2 and N1, respectively (Fig. E below) [Figures for referees not shown.]. Our results suggest that SMIM26 was capable of enhancing the interaction of AGK and SLC25A11.

2. The authors suggest that RNA binding protein PABPC4 regulates SMIM26 expression. Although the levels of PABPC4 in ccRCC are lower than the adjacent normal tissues, however, the authors did not show that PABPC4 expression is lower in ACSN than that in HEK293 cells. In Fig.3C, the authors have examined the levels of PABPC4 in these two cell lines individually, they need run the samples in the same gel to compare the levels of PABPC4 in these cell lines directly.

**Response:** Thank you. The result of western blotting showed that the expressions of SMIM26 and PABPC4 in ACHN were lower than those in HEK293T. The results are shown in the figure below[Figures for referees not shown.], and please refer to Fig.3E of our revised manuscript.

3. The authors claimed that "Blockage on the interaction of SMIM26-SCL25A11 by siRNAs dramatically abrogated the SMIM26-mediated suppression of cell migration and invasion (Fig. 5P and Fig. S6G)". Based on the method they used (siRNA to knockdown SLC25A11), the authors did not provide direct evidence to support that SMIM26 plays a regulative role in mitochondrial function and cell migration by binding to SLC25A11. Rescue experiment with full length and mutant SCL25A11 not binding with SMIM26 might be helpful.

**Response:** Thank you for your constructive suggestions. According to the structural



annotation of SLC25A11 in UniPort (<https://www.uniprot.org/>), three plasmids encoding truncated SLC25A11 protein lacking R1, R2 or R3 were constructed (Fig. A below). Co-IP experiments, using specific antibodies of flag and Myc, indicated that SLC25A11 interacted with SMIM26 through R1 domain (Fig. B below).

Next, rescue experiments with full length and  $\Delta$ R1 SCL25A11 were performed in SMIM26-overexpressing ccRCC cells. Re-expression of full length SCL25A11, but not  $\Delta$ R1 SLC25A11, markedly restored SLC25A11 siRNA-mediated rescue of cell migration and invasion in ACHN and 769-P cells with ectopic SMIM26 (Fig. C-D below)[Figures for referees not shown.] suggest that SMIM26 exerts anti-metastatic activity via interaction with SLC25A11.

4. Based on the proposed model that SMIM26 retains AGK in mitochondria to inhibit its capability of catalyzing AKT phosphorylation, while overexpression of AGK in SMIM26-expression cells rescued the AKT phosphorylation, the authors are recommended to examine whether the levels of AGK in cytoplasm (outside of mitochondria) and PTEN phosphorylation are increased when AGK is overexpressed in SMIM26-expression ccRCC cells.

**Response:** Thank you. AGK has been implicated in cancer by phosphorylating PTEN at Thr382/383 to block its phosphatase activity [1,2]. Our supplementary data showed that phosphorylation of AKT and PTEN was decreased by SMIM26 overexpression, but was increased by AGK overexpression. Ectopic expression of AGK resulted in restoration of SMIM26-reduced PTEN phosphorylation at Thr382/383 (Fig. A below). On the other hand, the expression of cytosolic AGK was markedly increased when AGK was overexpressed in SMIM26-expressing ccRCC cells (Fig. B below)[Figures for referees not shown.].

[1] Hu Z, Qu G, Yu X, Jiang H, Teng XL, Ding L, Hu Q, Guo X, Zhou Y, Wang F, Li HB, Chen L, Jiang J, Su B, Liu J, Zou Q. Acylglycerol Kinase Maintains Metabolic State and Immune Responses of CD8+ T Cells. *Cell Metabolism*. 2019 Aug 6;30(2):290-302.e5. doi: 10.1016/j.cmet.2019.05.016.

[2] Ning N, Zhang S, Wu Q, Li X, Kuang D, Duan Y, Xia M, Liu H, Weng J, Ba H, Tang Z, Cheng X, Mei H, Huang L, Ao Q, Wang G, Hu Y, Laurence A, Wang J, Wang G, Yang XP. Inhibition of acylglycerol kinase sensitizes DLBCL to venetoclax via upregulation of FOXO1-mediated BCL-2 expression. *Theranostics*. 2022 Jul 18;12(12):5537-5550. doi: 10.7150/thno.72786.

Minor points:

1, In Fig.1F, The quantification result was not provided.

**Response:** Thank you for your comments. The quantification result has been provided in revised Fig. 1F.

2, In Fig. 1H & 1J, Fig. 3C & 3E & 3G, etc, The western blots lack molecular weight labels.

**Response:** Thank you for pointing out our omissions. The molecular weight labels have been provided in the related figures of our revised manuscript.

3, SMIM26-mut-flag (start codon ATG was mutated to GGA and stop codon TAA was mutated to GCT) plasmids. Why the stop codon in the SMIM26-mut-Flag is also mutated? Is it necessary?

**Response:** Thank you for your comments. In our study, we mutated the stop codon in the SMIM26-mut-Flag to prevent the translation of SMIM26 short abnormal variants, thus ensuring that the overexpressed RNA would not be translated into proteins.

4, In Fig. 4E, how is the intensity of F-actin fluorescence quantified? The method part did not give a detailed description.

**Response:** Thank you. The description of F-actin staining and quantification has been supplemented in the Materials and Methods section of our revised manuscript.

5, In Fig. 5I, The signals of immunoprecipitated Mut1 & Mut2 are much lower than the Full-length SMIM26. A better representative image is required.

**Response:** Thank you. We have redone the detection and provided better images in revised Figure 5I.

## Referee #2:

Declaration: I was involved in a previous evaluation process of this manuscript for another journal and provide my updated suggestions herein.

In the current manuscript Kun Meng and colleagues describe the expression and function of a small microprotein called SMIM26, which is encoded by the putative non-coding RNA LINC00493. The authors convincingly show that SMIM26 is expressed in a panel of human (cancer) cell lines. SMIM26 localizes to mitochondria and probably is inserted in the mitochondrial membrane. Using a custom-made anti-SMIM26 antibody that authors investigated the expression of this microprotein in a panel of normal and cancerous human tissues. They could detect a significant downregulation of SMIM26 protein, but not LINC00493 expression in kidney cancer (ccRCC). Since the expression of the SMIM26 microprotein and its host RNA showed a poor correlation in cells and tissues, the authors tried to identify post-transcriptional regulators of SMIM26. RNA pulldown and RIP assays revealed an interaction between LINC00493 and PABPC4 and knockdown of the latter reduced SMIM26 protein levels. Further cellular and molecular assays establish SMIM26 as an inhibitor of kidney cancer cell migration, invasion and metastasis potentially via its interaction with SLC2511 and AGK. These interactions enhance GSH import into mitochondria, decrease the fraction of AGK in the cytosol and thereby reduce AKT phosphorylation.

In summary, the authors performed a comprehensive panel of in vitro and in vivo experiments and could establish a critical function for a novel microprotein regulating cancer cell motility in a human cancer entity. Therefore, this study is relevant and important as it sheds light into a new and understudied fraction of the human proteome encoded by recently suggested non-coding transcripts.

However, before this manuscript can be accepted for publication, the authors need to address the following concerns:

Major concerns:

1) The authors identified 91 proteins that interact with LINC00493 (Figure 3) and decided to focus on PABPC4. Why? Was a potential impact of NCL on SMIM26 analyzed? What about the most strongly enriched candidate? What is the name of this protein and was it functionally analyzed?

**Response:** Thank you for your comments. We performed RNA pulldown-SILAC-MS in HEK293T and ACHN cells to identify the potential post-transcriptional regulators of SMIM26. A total of 91 proteins bound to LINC00493 were identified by three biological replicates. Compared with ACHN cells, the binding capabilities of 25 RNA-binding proteins (RBPs) were enhanced in HEK293T cells. When these 25 RBPs were subjected to the protein-RNA interactions software catRAPID, two candidates (PABPC4 and Nucleolin (NCL)) were predicted as LINC00493 regulators.

Nucleolin is an evolutionarily conserved RBP that plays crucial roles in multiple

molecular processes. It is essential for ribosomal biogenesis, ribosomal RNA (rRNA) transcription and processing, and assembly of ribosomes. Nucleolin also regulates multiple steps in messenger RNA (mRNA) processing, including splicing, stabilization, nucleus-cytoplasmic transport, and translation. Nucleolin is also implicated in the synthesis of microRNAs, the proliferation and survival of mammalian cells and self-renewal of embryonic stem cells. (Please refer to reference [1-3])

We next determined the effect of PABPC4 or NCL on the translation of LINC00493. Knockdown of PABPC4, but not NCL, significantly suppressed SMIM26 protein expression (Fig. A below). Therefore, PABPC4 was chosen for further investigations. Our data showed that PABPC4 was able to bind to LINC00493, but did not affect its mRNA expression (Fig. B-C below). The binding of PABPC4 and LINC00493 resulted in the increase of translation of LINC00493 into SMIM26 protein (Fig. D below)[Figures for referees not shown.] .

[1] Liu X, Mei W, Padmanaban V, Alwaseem H, Molina H, Passarelli MC, Tavora B, Tavazoie SF. A pro-metastatic tRNA fragment drives Nucleolin oligomerization and stabilization of its bound metabolic mRNAs. *Mol Cell*. 2022 Jul 21;82(14):2604-2617.e8. doi: 10.1016/j.molcel.2022.05.008.

[2] Santos T, Salgado GF, Cabrita EJ, Cruz C. Nucleolin: a binding partner of G-quadruplex structures. *Trends Cell Biol*. 2022 Jul;32(7):561-564. doi: 10.1016/j.tcb.2022.03.003.

[3] Abdelmohsen K, Gorospe M. RNA-binding protein nucleolin in disease. *RNA Biol*. 2012 Jun;9(6):799-808. doi: 10.4161/rna.19718.

2) The authors argue that PABPC4, via binding to LINC00493, regulates translation of SMIM26. Indeed, knockdown of PABPC4 decreases SMIM26 expression in two cell lines (Fig. 3C), seemingly without affecting RNA expression of LINC00493/SMIM26 (Fig. 3D). While this suggests a disturbed translation of SMIM26 upon PABP4 depletion, it is also possible that SMIM26 protein turnover is altered. Thus, the authors should analyze

microprotein stability (CHX treatments) in control and PABPC4-depleted cells.

**Response:** Thank you for your constructive suggestions. According to the suggestion, CHX treatment was applied to determine the stability of SMIM26 upon PABPC4 silencing. As shown by the Figure below [Figures for referees not shown.], the depletion of PABPC4 by siRNA markedly expression of SMIM26, but was not able to modulate the protein stability of SMIM26. The half-life of SMIM26 protein was not affected by PABPC4 knockdown in HEK293T cells.

3) The authors claim that the interaction between AGK and SMIM26 increases the amount of AGK in the mitochondria by preventing its transport to the cytosol. The data shown in Fig.6J are not really convincing nor consistent between both cell lines and lack the reverse (loss-of-function) experiment. Therefore, please provide a quantification of AGK protein levels in mitochondria and the cytosol in control and SMIM26 overexpressing cells normalized to COXIV and tubulin levels, respectively. Also, the authors should investigate AGK localization in LINC00493/SMIM26-depleted cells.

**Response:** Thank you for your constructive comments. We have reperformed the related experiments and replaced Fig. 6J with updated results. As shown in Fig. A below, statistical analyses indicated that SMIM26 overexpression significantly increased mitochondrial AGK, but decreased cytosolic AGK.

As suggested, AGK localization was further examined in SMIM26-depleted cells. We found that deletion of SMIM26 inhibited AGK accumulation in mitochondria (Fig. B below) [Figures for referees not shown.]. These data suggest that SMIM26 modulates the cellular localization of AGK.

4) In Figures 6L, M, O the authors show that AGK overexpression can revert SMIM26 effects on AKT phosphorylation as well as cell migration, invasion, and OCR rates. According to their model (Fig.7), AKT is the key downstream factor in this pathway. Please show that the AGK-mediated reversion depends on AKT. For example, the authors could knockdown AKT or use an AKT inhibitor.

**Response:** Thank you for your constructive comments. AKT inhibitor MK-2206 was used to determine the role of AKT activation in SMIM26-mediated phenotypes. The results of western blotting and transwell assays demonstrated that the reverse effect of AGK overexpression on SMIM26 can be inhibited by AKT inhibitor. The treatment of MK-2206 markedly inhibited the phosphorylation of AKT in ccRCC cells with SMIM26 and AGK overexpressions, and suppressed the AGK-mediated reversion of cell migration and invasion (Fig. A-B below)[Figures for referees not shown.].

Minor concerns:

5) Overall survival analysis is presented in Figure 2C using a 30:70 sample split. Please repeat analysis using 50:50 (median split) and / or upper 25% vs. lower 25%.

**Response:** Thank you for your constructive comments. Accordingly, we have redone the Kaplan-Meier analyses, using upper 25% vs. lower 25%. Patients with low SMIM26 expression were accompanied with worse prognosis, compared with those with high SMIM26 expression. Please refer to the figure below [Figures for referees not shown.] or our revised Figure 2C.

6) The authors state that "We next performed RNA pulldown coupled with stable isotope labeling by amino acids in cell culture (SILAC) mass spectrometric analysis (RNA pulldown-SILAC-MS) to identify the post-transcriptional regulators of SMIM26". The authors still need to explain the rationale of the SILAC approach and the selection of the two cell lines in more detail. Why was a SILAC method chosen?

**Response:** Thank you. Stable isotope labeling by amino acids in cell culture (SILAC) is a quantitative proteomic technique based on the incorporation of normal essential amino acids (light label) and isotopic modified amino acids (heavy label) into cell culture, leading to light- and heavy-marked protein synthesis. SILAC has been widely used in the identification of RNA binding proteins (RBPs) that is involved in protein translation [1-6]. Here we applied SILAC to screen for potential regulators of SMIM26 translation by quantitatively comparing the binding capacity of LINC00493 and RBPs in HEK293T and ACHN cells. We have supplemented this information in our revised manuscript.

[1] Nuria CV, Sergi S, Lara PM, Marion S, Falk B. The RNA fold interactome of evolutionary conserved RNA structures in *S. cerevisiae*. *Nature Communications*. 2020 Jun;11(1):2789. doi: 10.1038/s41467-020-16555-4.

[2] Séverine B, Yasmeen A, Laura TM, Céline V, Andy C, Peter G, Edouard B, Mark W, Angus I L. Establishment of a protein frequency library and its application in the reliable identification of specific protein interaction partners. *Mol Cell Proteomics*. 2010 May;9(5):861-879. doi: 10.1074/mcp.M900517-MCP200.

[3] Kugeratski FG, Hodge K, Lilla S, McAndrews KM, Zhou X, Hwang RF, Zanivan S, Kalluri R. Quantitative proteomics identifies the core proteome of exosomes with syntenin-1 as the highest abundant protein and a putative universal biomarker. *Nat Cell Biol*. 2021 Jun;23(6):631-641. doi: 10.1038/s41556-021-00693-y.

[4] Schäfer JA, Bozkurt S, Michaelis JB, Klann K, Münch C. Global mitochondrial protein import proteomics reveal distinct regulation by translation and translocation machinery. *Mol Cell*. 2022 Jan 20;82(2):435-446.e7. doi: 10.1016/j.molcel.2021.11.004.

[5] Kurosaki T, Mitsutomi S, Hewko A, Akimitsu N, Maquat LE. Integrative omics indicate FMRP sequesters mRNA from translation and deadenylation in human neuronal cells. *Mol Cell*. 2022 Dec 1;82(23):4564-4581.e11. doi: 10.1016/j.molcel.2022.10.018.

[6] Cox J, Matic I, Hilger M, Nagaraj N, Selbach M, Olsen JV, Mann M. A practical guide to the MaxQuant computational platform for SILAC-based quantitative proteomics. *Nat Protoc*. 2009;4(5):698-705. doi: 10.1038/nprot.2009.36.



(7) The authors developed an antibody against SMIM26 and performed IHC analyses in a large panel of tumor (T) and normal (N) tissues (see Fig.2B). Yet, in Figure 3G they limit their PABPC4-SMIM26 co-expression analysis to four T/N pairs only. The authors should perform IHC analyses in order to detect PABPC4 in their TMA and perform correlation analyses. Alternatively, the authors should leverage the CPTAC data and perform the respective correlation analysis.

**Response:** Thank you for your suggestion. As suggested, the correlation between SMIM26 and PABPC4 has been evaluated in both CPTAC and SYSUCC cohorts. Positively correlations have been found and indicated in our revised manuscript (Fig. A-B below) [Figures for referees not shown.].

8) The authors suggest that SMIM26 overexpression prevents EMT given its impact on Vimentin (see Fig.4F). Is E-cadherin expression altered as well?

**Response:** Thank you. The expressions of EMT markers including Fibronectin, E-cadherin and Vimentin have been detected in ccRCC cells with SMIM26 overexpression or depletion (Fig. A-B below)[Figures for referees not shown.].

(9) What is depicted in Fig.S7B? The figure is not intuitive and does not allow one to draw conclusions about pathway enrichment/depletion (statistics?). What are the individual lines/columns? Please provide a more convincing presentation of this KEGG pathway analysis.

**Response:** As suggested, graph images of KEGG pathway analysis have been replaced. Please refer to the following figure [Figures for referees not shown.] or our revised Appendix Fig. S8B.

10) Please provide patient sample information and ethical statement for analyses shown in Fig.2.

**Response:** Thank you. The information of patients enrolled in our study has been provided in our revised Appendix Table S1. Ethical statement was supplemented in the Materials and Methods section of our revised manuscript.

Further suggestions:

11) Please carefully check the manuscript and perform language editing, if needed.

**Response:** Thank you. We have carefully gone through our manuscript. Some grammar or type errors have been corrected.

12) In the discussion the authors mention that SMIM26 could be a target to treat cancers. However, SMIM26 is downregulated in cancers (see Figure 2). Thus, "target" might be misleading here. However, restoration of SMIM26 expression would be an option. Moreover, the authors might speculate about AGK inhibitors (alone or in combination with AKT inhibitors).

**Response:** Thank you. We have corrected the related errors in the discussion of the revised manuscript.

**Referee #3:**

In the paper entitled "Mitochondrial Microprotein SMIM26 Encoded by LINC00493 Exerts Antimetastatic Activity in Clear Cell Renal Cell Carcinoma" Meng and colleagues characterize a previously identified micropeptide derived from LINC00493 in ccRCC and show its localization at mitochondria. The paper is timely and research well-conceived, however I still have a few comments.

Major concerns:

-The effect on vimentin in 769-P is not convincing, thus rising the possibility of a cell line specific effect.

**Response:** Thank you for your constructive comments. To determine whether EMT was involved in SMIM26-mediated suppression of cell migration, we performed western blotting to examine the expressions of EMT markers including Fibronectin, E-cadherin and Vimentin. As shown in Fig. A-B below [Figures for referees not shown.], the expressions of Vimentin and Fibronectin were significantly downregulated by SMIM26 overexpression, and increased in cells with SMIM26 depletion. E-cadherin was increased in SMIM26-overexpressing cells. These data suggest that EMT was inhibited by the ectopic expression of SMIM26.

-Mouse experiment in Fig.4G is missing stats and "The Key control" (mutant control not producing SMIM26) to be able to claim that "SMIM26 and not LINC00493 suppresses ccRCC growth and metastasis".

**Response:** Thank you. According to the suggestion, we have reperformed the *in vivo* experiments. As shown in Fig. A-F [Figures for referees not shown.], SMIM26, but not blank control nor mutant control, markedly inhibited the tumor growth and metastasis in ccRCC.

-When testing different mutants of SMIM26 I am a bit surprised that the author missed again a key negative control: the protein missing the N-term that they claim is essential for binding to SLC25A11 and/or a fusion protein with a tag at the N-term, as such the protein should not be able to localize to the mitochondria anymore. Regarding this, has SMIM26 a mitochondrial localization signal?

**Response:** Thank you. As suggested, we have used a canonical signal peptide prediction software of SignalP to find that no mitochondrial localization signal was available in SMIM26. For the reviewer's concern, we actually constructed plasmids encoding flag-fused SMIM26 protein lacking N-terminal ( $\Delta$ 1-35aa, Mut2) (Fig. A-B below). However, Mut2 protein was not detectable, using antibodies of flag (Fig. C below). Instead, we detected the minimal SMIM26 motifs required for the binding of AGK and SLC25A11. Plasmids encoding 1-13 aa (N1) and 14-35 aa (N2) of N-terminal of SMIM26 protein were constructed (Fig. D below). Cellular fractionation experiments demonstrated that N2, but not N1, localized in mitochondria (Fig. E below)[Figures for referees not shown.]. The results of Co-IP indicated that SMIM26 interacted with AGK and SLC25A11 through N2 and N1, respectively (Fig. F below). These data have been supplemented in our revised manuscript.

-One major concern is that many experiments have been run on overexpression conditions. For instance, the complex between AGK and SCL25A11 should be probed in KD settings or in cells not expressing SMIM26, to be able to claim that SMIM26 is bridging these activities.

**Response:** Thank you for your constructive comments. According to the reviewer's suggestion, we have examined the binding ability of AGK with SLC25A11 in ccRCC cells with SMIM26 knockdown. The depletion of SMIM26 noticeably reduced the binding of AGK and SLC25A11 (Fig. below [Figures for referees not shown.] or Fig. 6L in the revised manuscript).

-There is no link between the in vivo phenotype and the identified protein partners of SMIM26. The co-IP could have been done on xenograft samples and/or immunohistochemistry for phosphor-AKT performed on mouse samples.

**Response:** Thank you. The phosphorylation of AKT at Ser473 was examined in xenograft tumor samples (Fig. A below), showing that AKT phosphorylation was decreased in tumors with SMIM26 overexpression, as compared with NC and Mut groups. Moreover, we also performed Co-IP assay, using proteins extracted from xenograft tumor tissues. The results indicated that SMIM26 formed protein complex with AGK and SLC25A11 (Fig. B below) [Figures for referees not shown.] .

Minor:

-In the abstract the authors say: "Especially, the lncRNA-derived mitochondrial microproteins are rarely investigated." This is inaccurate. Actually, localization of many of these micropeptides at mitochondria was one of the first observations following their discovery and this even raised the concern that mito localization could be an artifact of their overexpression and/or of their tagging.

**Response:** We thank the reviewer's concern. We have deleted the related sentence in our revised abstract.

-Title of the first paragraph in the results section: "SMIM26 is a microprotein endogenously encoded by LINC00493 and localizes in mitochondria". It is not clear to me what endogenously means here.

**Response:** Thank you. We have deleted "endogenously" in the related sentence.

-Last paragraph before discussion: "We then performed RNA-seq in ACHN cells to disclose the downstream pathway through which SMIM26 inhibits cell migration." Here it should be indicated that the RNA-seq was run the overexpressing cells, as compared to the knock down mentioned afterwards, to avoid confusion.

**Response:** Thank you. We have corrected the related sentence to "We then performed RNA-seq in SMIM26-overexpressing ACHN cells to disclose the downstream pathway through which SMIM26 inhibited cell migration."

Dear Dr. Zhang,

Thank you for the submission of your revised manuscript to our editorial offices. I have now received the reports from two of the three referees that I have asked to re-evaluate your study, you will find below. Referee #3 declined to look into the revision. However, going through your point-by-point response, I consider his/her points as adequately addressed. As you will see, the remaining two referees now fully support the publication of your study in EMBO reports.

Before I can proceed with formal acceptance, I have these editorial requests I ask you to address in a final revised manuscript:

- Please provide a title with not more than 100 characters (including spaces).
  - We updated our journal's competing interests policy in January 2022 and request authors to consider both actual and perceived competing interests. Please review the policy <https://www.embopress.org/competing-interests> and update your competing interests if necessary. Please name this section 'Disclosure and Competing Interests Statement' and put it after the Acknowledgements section.
  - We now use CRediT to specify the contributions of each author in the journal submission system. CRediT replaces the author contribution section. Please use the free text box to provide more detailed descriptions. Thus, please remove the author contributions section from the manuscript text file. See also guide to authors: <https://www.embopress.org/page/journal/14693178/authorguide#authorshipguidelines>
  - Please order the manuscript sections like this, using these names:  
Title page - Abstract - Keywords - Introduction - Results - Discussion - Materials and Methods - Data availability section - Acknowledgements - Disclosure and Competing Interests Statement - References - Figure legends - Expanded View Figure legends
  - Regarding data quantification and statistics, please make sure that the number "n" for how many independent experiments were performed, their nature (biological versus technical replicates), the bars and error bars (e.g. SEM, SD) and the test used to calculate p-values is indicated in the respective figure legends (main, EV and Appendix figures). Please also check that all the p-values are explained in the legend, and that these fit to those shown in the figure. Please provide statistical testing where applicable. Please avoid the phrase 'independent experiment', but clearly state if these were biological or technical replicates. Please also indicate (e.g. with n.s.) if testing was performed, but the differences are not significant.
- In case n=2, please show the data as separate datapoints without error bars and statistics.
- See also:  
<http://www.embopress.org/page/journal/14693178/authorguide#statisticalanalysis>
- If n<5, please show single datapoints for diagrams.
- Please add scale bars of similar style and thickness to all the microscopic images (main, EV and Appendix figures) using clearly visible black or white bars (depending on the background). Please place these in the lower right corner of the images. Please do not write on or near the bars in the image but define the size in the respective figure legend. Presently, most scale bars are too thin or can hardly be seen versus the background. Some also still have writing nearby (i.e. in the Appendix). Please check.
  - Please add a separate paragraph to the methods section regarding human samples. Please indicate there that informed consent was obtained from all subjects and that the experiments (sample collections) were approved, and by whom (institution, government). Please also fill in the respective fields (ethics, human participants) in the author checklist.
  - Please remove the referee tokens for the deposited datasets from the manuscript text. Please add direct links to these datasets to the data availability section and make sure that these datasets are public latest upon online publication of the manuscript.
  - Please make sure that all figure panels are called out separately and sequentially (main, EV and Appendix figures). Presently, there seems to be no callout for Fig. EV2E. Please check.
  - Please do not show the title page with full affiliations in the Appendix file. Just state here 'Appendix for ...' followed by a detailed table of contents (TOC).
  - Finally, please find attached a word file of the manuscript text (provided by our publisher) with changes we ask you to include in your final manuscript text and comments. Please use the attached file as basis for further revisions and provide your final

manuscript file with track changes, in order that we can see any modifications done.

In addition, I would need from you:

- a short, two-sentence summary of the manuscript (not more than 35 words).
- two to four short bullet points highlighting the key findings of your study (two lines each).
- a schematic summary figure that provides a sketch of the major findings (not a data image) in jpeg or tiff format (with the exact width of 550 pixels and a height of not more than 400 pixels) that can be used as a visual synopsis on our website.

I look forward to seeing the final revised version of your manuscript when it is ready. Please let me know if you have questions regarding the revision.

Please use this link to submit your revision: <https://embor.msubmit.net/cgi-bin/main.plex>

Best,

Achim Breiling  
Senior Editor  
EMBO Reports

-----

Referee #1:

The manuscript is suitable for publication in EMBO reports without further revision.

-----

Referee #2:

The authors fully addressed my concerns. I do not have any further questions.



The authors have addressed all minor editorial requests.

Chris Zhiyi Zhang  
Ji Nan University  
Huang Pu Avenue West 601  
Guang Dong 510632  
China

Dear Dr. Zhang,

I am very pleased to accept your manuscript for publication in the next available issue of EMBO reports. Thank you for your contribution to our journal.

At the end of this email I include important information about how to proceed. Please ensure that you take the time to read the information and complete and return the necessary forms to allow us to publish your manuscript as quickly as possible.

As part of the EMBO publication's Transparent Editorial Process, EMBO reports publishes online a Review Process File to accompany accepted manuscripts. As you are aware, this File will be published in conjunction with your paper and will include the referee reports, your point-by-point response and all pertinent correspondence relating to the manuscript.

If you do NOT want this File to be published, please inform the editorial office within 2 days, if you have not done so already, otherwise the File will be published by default [contact: emboreports@embo.org]. If you do opt out, the Review Process File link will point to the following statement: "No Review Process File is available with this article, as the authors have chosen not to make the review process public in this case."

Should you be planning a Press Release on your article, please get in contact with emboreports@wiley.com as early as possible, in order to coordinate publication and release dates.

Thank you again for your contribution to EMBO reports and congratulations on a successful publication. Please consider us again in the future for your most exciting work.

Yours sincerely,

Achim Breiling  
Senior Editor  
EMBO Reports

\*\*\*\*\*

THINGS TO DO NOW:

Please note that you will be contacted by Wiley Author Services to complete licensing and payment information. The required 'Page Charges Authorization Form' is available here: [https://www.embopress.org/pb-assets/embo-site/er\\_apc.pdf](https://www.embopress.org/pb-assets/embo-site/er_apc.pdf) - please download and complete the form and return to [embopressproduction@wiley.com](mailto:embopressproduction@wiley.com)

EMBO Press participates in many Publish and Read agreements that allow authors to publish Open Access with reduced/no publication charges. Check your eligibility: <https://authorservices.wiley.com/author-resources/Journal-Authors/open-access/affiliation-policies-payments/index.html>

You will receive proofs by e-mail approximately 2-3 weeks after all relevant files have been sent to our Production Office; you should return your corrections within 2 days of receiving the proofs.

Please inform us if there is likely to be any difficulty in reaching you at the above address at that time. Failure to meet our deadlines may result in a delay of publication, or publication without your corrections.

All further communications concerning your paper should quote reference number EMBOR-2022-56282V3 and be addressed to [emboreports@wiley.com](mailto:emboreports@wiley.com).

Should you be planning a Press Release on your article, please get in contact with [emboreports@wiley.com](mailto:emboreports@wiley.com) as early as possible, in order to coordinate publication and release dates.

## EMBO Press Author Checklist

|                                              |
|----------------------------------------------|
| Corresponding Author Name: Chris Zhiyi Zhang |
| Journal Submitted to: EMBO Reports           |
| Manuscript Number: EMBOR-2022-56282-T        |

### USEFUL LINKS FOR COMPLETING THIS FORM

- [The EMBO Journal - Author Guidelines](#)
- [EMBO Reports - Author Guidelines](#)
- [Molecular Systems Biology - Author Guidelines](#)
- [EMBO Molecular Medicine - Author Guidelines](#)

### Reporting Checklist for Life Science Articles (updated January 2022)

This checklist is adapted from Materials Design Analysis Reporting (MDAR) Checklist for Authors. MDAR establishes a minimum set of requirements in transparent reporting in the life sciences (see Statement of Task: [10.31222/osf.io/9sm4x](https://doi.org/10.31222/osf.io/9sm4x)). Please follow the journal's guidelines in preparing your manuscript.

**Please note that a copy of this checklist will be published alongside your article.**

### Abridged guidelines for figures

#### 1. Data

The data shown in figures should satisfy the following conditions:

- the data were obtained and processed according to the field's best practice and are presented to reflect the results of the experiments in an accurate and unbiased manner.
- ideally, figure panels should include only measurements that are directly comparable to each other and obtained with the same assay.
- plots include clearly labeled error bars for independent experiments and sample sizes. Unless justified, error bars should not be shown for technical replicates.
- if  $n < 5$ , the individual data points from each experiment should be plotted. Any statistical test employed should be justified.
- Source Data should be included to report the data underlying figures according to the guidelines set out in the authorship guidelines on Data Presentation.

#### 2. Captions

Each figure caption should contain the following information, for each panel where they are relevant:

- a specification of the experimental system investigated (eg cell line, species name).
- the assay(s) and method(s) used to carry out the reported observations and measurements.
- an explicit mention of the biological and chemical entity(ies) that are being measured.
- an explicit mention of the biological and chemical entity(ies) that are altered/varied/perturbed in a controlled manner.
- the exact sample size (n) for each experimental group/condition, given as a number, not a range;
- a description of the sample collection allowing the reader to understand whether the samples represent technical or biological replicates (including how many animals, litters, cultures, etc.).
- a statement of how many times the experiment shown was independently replicated in the laboratory.
- definitions of statistical methods and measures:
  - common tests, such as t-test (please specify whether paired vs. unpaired), simple  $\chi^2$  tests, Wilcoxon and Mann-Whitney tests, can be unambiguously identified by name only, but more complex techniques should be described in the methods section;
  - are tests one-sided or two-sided?
  - are there adjustments for multiple comparisons?
  - exact statistical test results, e.g., P values = x but not P values < x;
  - definition of 'center values' as median or average;
  - definition of error bars as s.d. or s.e.m.

**Please complete ALL of the questions below.**  
Select "Not Applicable" only when the requested information is not relevant for your study.

### Materials

| Category                                                                                                                                                                                                      | Information included in the manuscript? | In which section is the information available?<br><small>(Reagents and Tools Table, Materials and Methods, Figures, Data Availability Section)</small> |
|---------------------------------------------------------------------------------------------------------------------------------------------------------------------------------------------------------------|-----------------------------------------|--------------------------------------------------------------------------------------------------------------------------------------------------------|
| <b>Newly Created Materials</b>                                                                                                                                                                                |                                         |                                                                                                                                                        |
| New materials and reagents need to be available; do any restrictions apply?                                                                                                                                   | Not Applicable                          |                                                                                                                                                        |
| <b>Antibodies</b>                                                                                                                                                                                             |                                         |                                                                                                                                                        |
| For antibodies provide the following information:<br>- Commercial antibodies: RRID (if possible) or supplier name, catalogue number and/or clone number<br>- Non-commercial: RRID or citation                 | Yes                                     | Materials and Methods                                                                                                                                  |
| <b>DNA and RNA sequences</b>                                                                                                                                                                                  |                                         |                                                                                                                                                        |
| Short novel DNA or RNA including primers, probes: provide the sequences.                                                                                                                                      | Yes                                     | Appendix Table S6                                                                                                                                      |
| <b>Cell materials</b>                                                                                                                                                                                         |                                         |                                                                                                                                                        |
| <b>Cell lines:</b> Provide species information, strain. Provide accession number in repository OR supplier name, catalog number, clone number, and/OR RRID.                                                   | Yes                                     | Materials and Methods                                                                                                                                  |
| <b>Primary cultures:</b> Provide species, strain, sex of origin, genetic modification status.                                                                                                                 | Not Applicable                          |                                                                                                                                                        |
| Report if the cell lines were recently <b>authenticated</b> (e.g., by STR profiling) and tested for mycoplasma contamination.                                                                                 | Yes                                     | Materials and Methods                                                                                                                                  |
| <b>Experimental animals</b>                                                                                                                                                                                   |                                         |                                                                                                                                                        |
| <b>Laboratory animals or Model organisms:</b> Provide species, strain, sex, age, genetic modification status. Provide accession number in repository OR supplier name, catalog number, clone number, OR RRID. | Yes                                     | Materials and Methods                                                                                                                                  |
| <b>Animal observed in or captured from the field:</b> Provide species, sex, and age where possible.                                                                                                           | Yes                                     | Materials and Methods                                                                                                                                  |
| Please detail housing and husbandry conditions.                                                                                                                                                               | Not Applicable                          |                                                                                                                                                        |
| <b>Plants and microbes</b>                                                                                                                                                                                    |                                         |                                                                                                                                                        |
| <b>Plants:</b> provide species and strain, ecotype and cultivar where relevant, unique accession number if available, and source (including location for collected wild specimens).                           | Not Applicable                          |                                                                                                                                                        |
| <b>Microbes:</b> provide species and strain, unique accession number if available, and source.                                                                                                                | Not Applicable                          |                                                                                                                                                        |
| <b>Human research participants</b>                                                                                                                                                                            |                                         |                                                                                                                                                        |
| If collected and within the bounds of privacy constraints report on age, sex and gender or ethnicity for all study participants.                                                                              | Not Applicable                          |                                                                                                                                                        |
| <b>Core facilities</b>                                                                                                                                                                                        |                                         |                                                                                                                                                        |
| If your work benefited from core facilities, was their service mentioned in the acknowledgments section?                                                                                                      | Not Applicable                          |                                                                                                                                                        |

### Design

| <b>Study protocol</b>                                                                                                                                                                                                                                                                                                                      | <b>Information included in the manuscript?</b> | <b>In which section is the information available?</b><br>(Reagents and Tools Table, Materials and Methods, Figures, Data Availability Section) |
|--------------------------------------------------------------------------------------------------------------------------------------------------------------------------------------------------------------------------------------------------------------------------------------------------------------------------------------------|------------------------------------------------|------------------------------------------------------------------------------------------------------------------------------------------------|
| If study protocol has been <b>pre-registered</b> , provide DOI in the manuscript. For clinical trials, provide the trial registration number OR cite DOI.                                                                                                                                                                                  | Not Applicable                                 |                                                                                                                                                |
| Report the <b>clinical trial registration number</b> (at ClinicalTrials.gov or equivalent), where applicable.                                                                                                                                                                                                                              | Not Applicable                                 |                                                                                                                                                |
| <b>Laboratory protocol</b>                                                                                                                                                                                                                                                                                                                 | <b>Information included in the manuscript?</b> | <b>In which section is the information available?</b><br>(Reagents and Tools Table, Materials and Methods, Figures, Data Availability Section) |
| Provide DOI OR other citation details if <b>external detailed step-by-step protocols</b> are available.                                                                                                                                                                                                                                    | Not Applicable                                 |                                                                                                                                                |
| <b>Experimental study design and statistics</b>                                                                                                                                                                                                                                                                                            | <b>Information included in the manuscript?</b> | <b>In which section is the information available?</b><br>(Reagents and Tools Table, Materials and Methods, Figures, Data Availability Section) |
| Include a statement about <b>sample size</b> estimate even if no statistical methods were used.                                                                                                                                                                                                                                            | Yes                                            | Figure legends                                                                                                                                 |
| Were any steps taken to minimize the effects of subjective bias when allocating animals/samples to treatment (e.g. <b>randomization procedure</b> )? If yes, have they been described?                                                                                                                                                     | Yes                                            | Materials and Methods                                                                                                                          |
| Include a statement about <b>blinding</b> even if no blinding was done.                                                                                                                                                                                                                                                                    | Not Applicable                                 |                                                                                                                                                |
| Describe <b>inclusion/exclusion criteria</b> if samples or animals were excluded from the analysis. Were the criteria pre-established?                                                                                                                                                                                                     | Not Applicable                                 |                                                                                                                                                |
| If sample or data points were omitted from analysis, report if this was due to attrition or intentional exclusion and provide justification.                                                                                                                                                                                               |                                                |                                                                                                                                                |
| For every figure, are <b>statistical tests</b> justified as appropriate? Do the data meet the assumptions of the tests (e.g., normal distribution)? Describe any methods used to assess it. Is there an estimate of variation within each group of data? Is the variance similar between the groups that are being statistically compared? | Yes                                            | Figure legends                                                                                                                                 |
| <b>Sample definition and in-laboratory replication</b>                                                                                                                                                                                                                                                                                     | <b>Information included in the manuscript?</b> | <b>In which section is the information available?</b><br>(Reagents and Tools Table, Materials and Methods, Figures, Data Availability Section) |
| In the figure legends: state number of times the experiment was <b>replicated</b> in laboratory.                                                                                                                                                                                                                                           | Yes                                            | Figure legends                                                                                                                                 |
| In the figure legends: define whether data describe <b>technical or biological replicates</b> .                                                                                                                                                                                                                                            | Yes                                            | Figure legends                                                                                                                                 |

#### Ethics

| <b>Ethics</b>                                                                                                                                                                                                                                                                                            | <b>Information included in the manuscript?</b> | <b>In which section is the information available?</b><br>(Reagents and Tools Table, Materials and Methods, Figures, Data Availability Section) |
|----------------------------------------------------------------------------------------------------------------------------------------------------------------------------------------------------------------------------------------------------------------------------------------------------------|------------------------------------------------|------------------------------------------------------------------------------------------------------------------------------------------------|
| Studies involving <b>human participants</b> : State details of <b>authority granting ethics approval</b> (IRB or equivalent committee(s), provide reference number for approval.                                                                                                                         | Yes                                            | Materials and Methods                                                                                                                          |
| Studies involving <b>human participants</b> : Include a statement confirming that <b>informed consent</b> was obtained from all subjects and that the experiments conformed to the principles set out in the WMA Declaration of Helsinki and the Department of Health and Human Services Belmont Report. | Yes                                            | Materials and Methods                                                                                                                          |
| Studies involving <b>human participants</b> : For publication of <b>patient photos</b> , include a statement confirming that consent to publish was obtained.                                                                                                                                            | Not Applicable                                 |                                                                                                                                                |
| Studies involving experimental <b>animals</b> : State details of <b>authority granting ethics approval</b> (IRB or equivalent committee(s), provide reference number for approval. Include a statement of compliance with ethical regulations.                                                           | Yes                                            | Materials and Methods                                                                                                                          |
| Studies involving <b>specimen and field samples</b> : State if relevant <b>permits</b> obtained, provide details of authority approving study; if none were required, explain why.                                                                                                                       | Yes                                            | Materials and Methods                                                                                                                          |
| <b>Dual Use Research of Concern (DURC)</b>                                                                                                                                                                                                                                                               | <b>Information included in the manuscript?</b> | <b>In which section is the information available?</b><br>(Reagents and Tools Table, Materials and Methods, Figures, Data Availability Section) |
| Could your study fall under dual use research restrictions? Please check biosecurity documents and list of <b>select agents and toxins</b> (CDC): <a href="https://www.selectagents.gov/sat/list.htm">https://www.selectagents.gov/sat/list.htm</a> .                                                    | Not Applicable                                 |                                                                                                                                                |
| If you used a select agent, is the security level of the lab appropriate and reported in the manuscript?                                                                                                                                                                                                 | Not Applicable                                 |                                                                                                                                                |
| If a study is subject to dual use research of concern regulations, is the name of the <b>authority granting approval</b> and <b>reference number</b> for the regulatory approval provided in the manuscript?                                                                                             | Not Applicable                                 |                                                                                                                                                |

#### Reporting

The MDAR framework recommends adoption of discipline-specific guidelines, established and endorsed through community initiatives. Journals have their own policy about requiring specific guidelines and recommendations to complement MDAR.

| <b>Adherence to community standards</b>                                                                                                                                                                                                                                                                                              | <b>Information included in the manuscript?</b> | <b>In which section is the information available?</b><br>(Reagents and Tools Table, Materials and Methods, Figures, Data Availability Section) |
|--------------------------------------------------------------------------------------------------------------------------------------------------------------------------------------------------------------------------------------------------------------------------------------------------------------------------------------|------------------------------------------------|------------------------------------------------------------------------------------------------------------------------------------------------|
| State if relevant guidelines or checklists (e.g., ICMJE, MIBBI, ARRIVE, PRISMA) have been followed or provided.                                                                                                                                                                                                                      | Not Applicable                                 |                                                                                                                                                |
| For <b>tumor marker prognostic studies</b> , we recommend that you follow the <b>REMARK</b> reporting guidelines (see link list at top right). See author guidelines, under 'Reporting Guidelines'. Please confirm you have followed these guidelines.                                                                               | Not Applicable                                 |                                                                                                                                                |
| For <b>phase II and III randomized controlled trials</b> , please refer to the <b>CONSORT</b> flow diagram (see link list at top right) and submit the <b>CONSORT</b> checklist (see link list at top right) with your submission. See author guidelines, under 'Reporting Guidelines'. Please confirm you have submitted this list. | Not Applicable                                 |                                                                                                                                                |

#### Data Availability

| <b>Data availability</b>                                                                                                                                                                          | <b>Information included in the manuscript?</b> | <b>In which section is the information available?</b><br>(Reagents and Tools Table, Materials and Methods, Figures, Data Availability Section) |
|---------------------------------------------------------------------------------------------------------------------------------------------------------------------------------------------------|------------------------------------------------|------------------------------------------------------------------------------------------------------------------------------------------------|
| Have <b>primary datasets</b> been deposited according to the journal's guidelines (see 'Data Deposition' section) and the respective accession numbers provided in the Data Availability Section? | Yes                                            | Data Availability Section                                                                                                                      |
| Were <b>human clinical and genomic datasets</b> deposited in a public access-controlled repository in accordance to ethical obligations to the patients and to the applicable consent agreement?  | Not Applicable                                 |                                                                                                                                                |
| Are <b>computational models</b> that are central and integral to a study available without restrictions in a machine-readable form? Were the relevant accession numbers or links provided?        | Not Applicable                                 |                                                                                                                                                |
| If publicly available data were reused, provide the respective <b>data citations</b> in the reference list.                                                                                       | Not Applicable                                 |                                                                                                                                                |
