# Supplementary material
Source: PubMed Central journal article supplement (PMC10240204)
Supplement: EMBR-24-e56282-s006.pdf [file EMBR-24-e56282-s006.pdf]

## **Appendix for: LINC00493-encoded microprotein SMIM26 exerts antimetastatic activity in renal cell carcinoma**

### **Contents:**

|                                                                                                                                                 |       |
|-------------------------------------------------------------------------------------------------------------------------------------------------|-------|
| <b>Appendix Fig S1.</b> The sequence signature of SMIM26.                                                                                       | p. 2  |
| <b>Appendix Fig S2.</b> Two unique peptides of SMIM26 are identified by shotgun MS.                                                             | p. 2  |
| <b>Appendix Fig S3.</b> SMIM26 can't form multimers.                                                                                            | p. 3  |
| <b>Appendix Fig S4.</b> Generation of anti-SMIM26 antibody.                                                                                     | p. 3  |
| <b>Appendix Fig S5.</b> Schematic of the SILAC-based quantitative RNA–protein interactomics workflow.                                           | p. 4  |
| <b>Appendix Fig S6.</b> PABPC4 and SMIM26 expression is correlated.                                                                             | p. 4  |
| <b>Appendix Fig S7.</b> Silencing of SMIM26 promotes tumorigenesis and metastasis.                                                              | p. 5  |
| <b>Appendix Fig S8.</b> RNA-seq reveals that SMIM26 is involved in PI3K/AKT signaling.                                                          | p. 5  |
| <b>Appendix Fig S9.</b> Monitoring of the oxygen consumption profile in ACHN cells with the indicated treatment using a Seahorse XF24 analyzer. | p. 6  |
| <b>Appendix Table S1.</b> Clinical characteristics of patients with ccRCC in this study.                                                        | p. 7  |
| <b>Appendix Table S2.</b> Fold change of LINC00493 binding proteins identified by SMIM26 RNA-pulldown SILAC MS.                                 | p. 8  |
| <b>Appendix Table S3.</b> SMIM26 binding proteins identified by Co-IP MS.                                                                       | p. 9  |
| <b>Appendix Table S4.</b> SMIM26 binding proteins identified by SILAC-IP MS.                                                                    | p. 10 |
| <b>Appendix Table S5.</b> SMIM26 binding proteins identified by GST-SMIM26 pulldown MS.                                                         | p. 11 |
| <b>Appendix Table S6.</b> Sequences of Primers, shRNAs, siRNAs.                                                                                 | p. 12 |

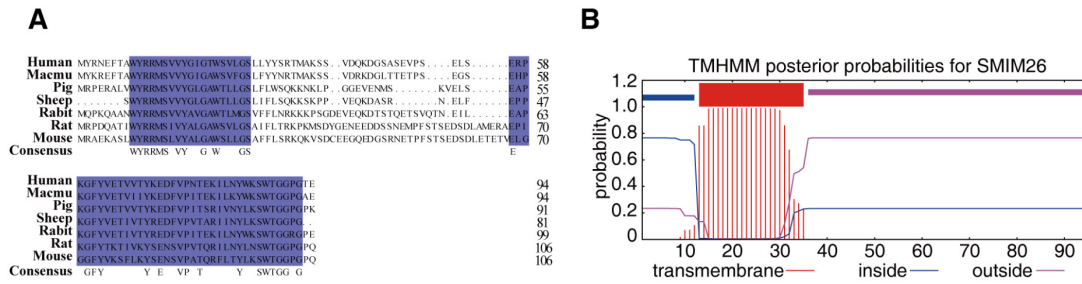

**Appendix Fig S1. The sequence signature of SMIM26. (A)** The homology of SMIM26 in different species. The dark blue sequence is the homologous sequence, and the white part is the sequence without homology. **(B)** The sequence characteristics of SMIM26 protein were predicted by TMHMM, 14-35 amino acids construct the transmembrane region.

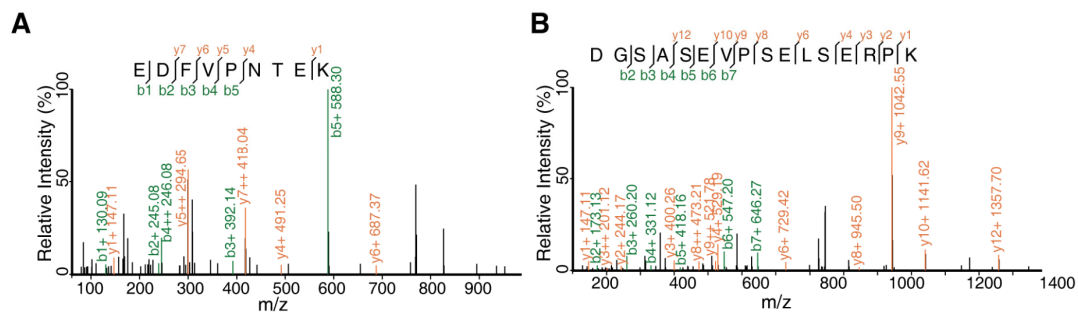

**Appendix Fig S2. Two unique peptides of SMIM26 are identified by shotgun MS (A-B)**

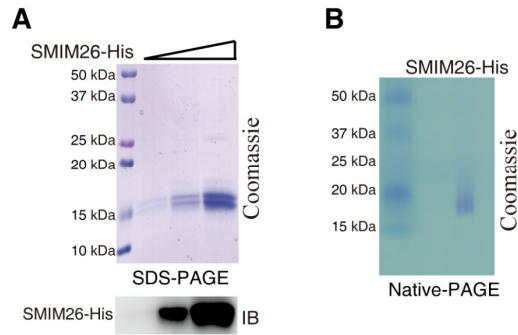

**Appendix Fig S3. SMIM26 can't form multimers. (A)** Coomassie blue staining and western blotting showing purified SMIM26-His. **(B)** Coomassie blue staining of SMIM26-His with Native-PAGE electrophoresis.

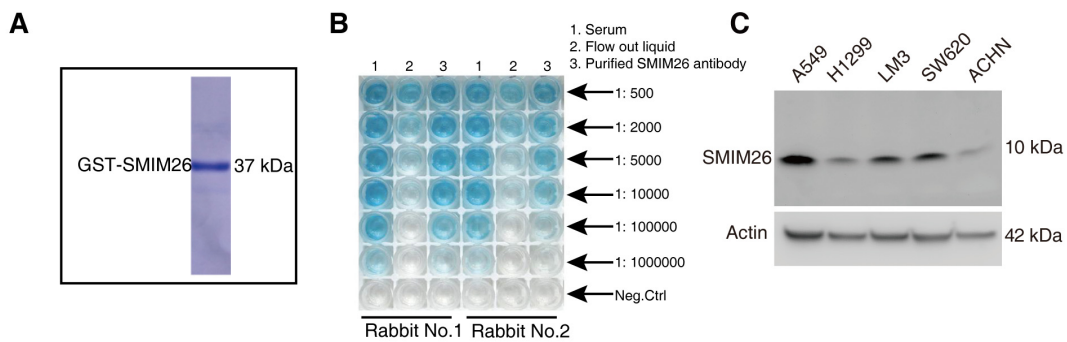

**Appendix Fig S4. Generation of anti-SMIM26 antibody. (A)** Coomassie blue staining showing purified GST-SMIM26. **(B)** The generation of anti-SMIM26 antibody from rabbits. **(C)** Immunoblotting verification of SMIM26 expression in multiple human cell lines.

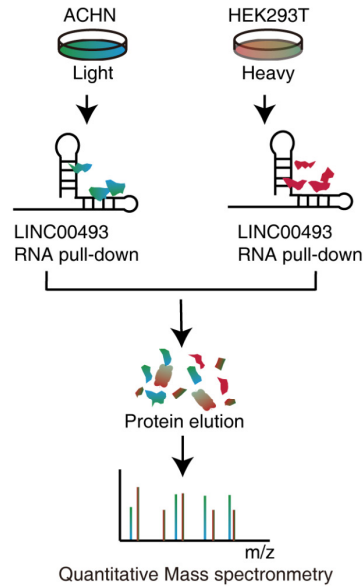

**Appendix Fig S5. Schematic of the SILAC-based quantitative RNA-protein interactomics workflow.**

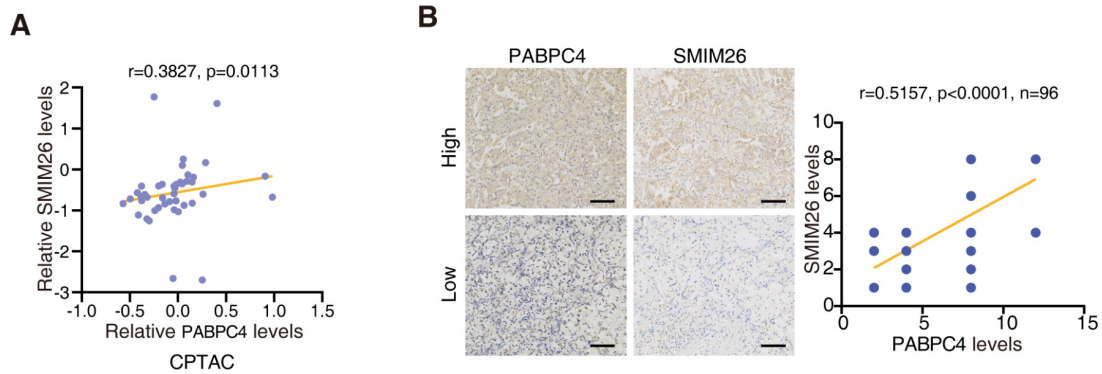

**Appendix Fig S6. PABPC4 and SMIM26 expression is correlated. (A)** SMIM26 is positively correlated with PABPC4 in CPTAC database. Spearman correlation is 0.3827,  $p=0.0113$ . **(B)** SMIM26 is positively correlated with PABPC4 in 96 ccRCC samples immunohistochemistry staining. Spearman correlation is 0.5157,  $p<0.0001$ . Scale bar, 100  $\mu\text{m}$ .

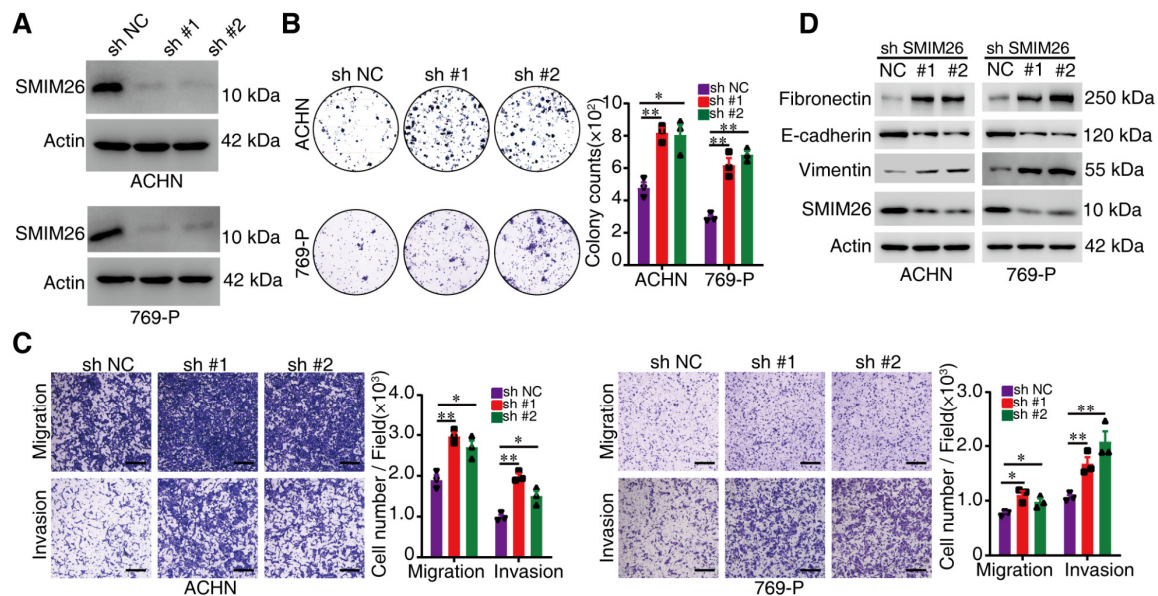

**Appendix Fig S7. Silencing of SMIM26 promotes tumorigenesis and metastasis. (A)** Immunoblotting validation of the knockdown effect of SMIM26 in ccRCC cells. **(B)** Knockdown of SMIM26 promotes the clone formation capacity of ccRCC cells. Data are representative of three biological replicates. Unpaired two-tailed Student's t-test,  $*P < 0.05$ ,  $**P < 0.01$ . Bars, SEM. **(C)** Transwell assays were used to test the migration and invasion abilities of both ccRCC cells with knockdown of SMIM26. Data are representative of three biological replicates. Scale bar, 600  $\mu\text{m}$ . Unpaired two-tailed Student's t-test,  $*P < 0.05$ ,  $**P < 0.01$ . Bars, SEM. **(D)** Immunoblotting validation of EMT marker of Vimentin, Fibronectin, and E-cadherin.

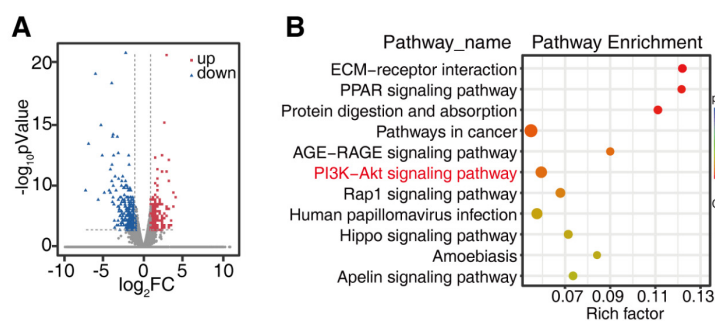

**Appendix Fig S8. RNA-seq reveals that SMIM26 is involved in PI3K/AKT signaling. (A)** RNA-seq was performed to determine the differentially expressed genes in ACHN cells with or without SMIM26 overexpression. **(B)** Bubble plot showing the KEGG pathways enriched by SMIM26-regulated differentially expressed genes.

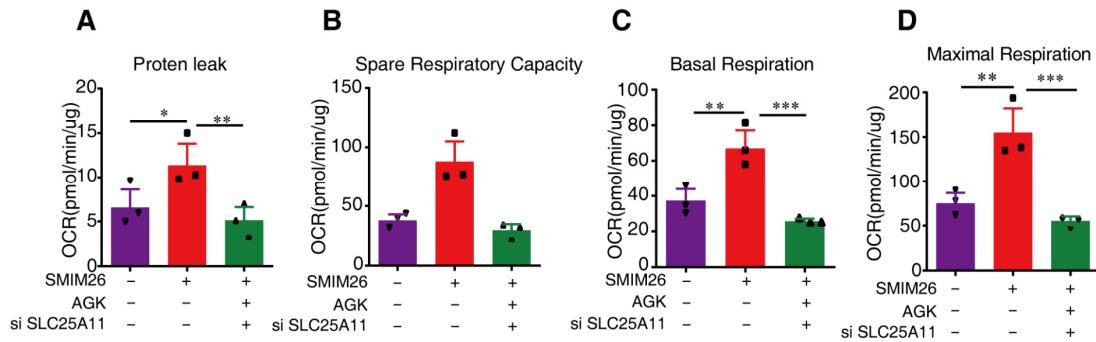

**Appendix Fig S9. Monitoring of the oxygen consumption profile in ACHN cells with the indicated treatment using a Seahorse XF24 analyzer.** Proton leak (A), spare respiratory capacity (B), basal respiration (C), and maximal respiration (D) were statistically analyzed. Data are representative of three biological replicates. Unpaired two-tailed Student's t-test, \* $P < 0.05$ , \*\* $P < 0.01$ , \*\*\* $P < 0.001$ . Bar, SD.

**Appendix Table S1. Clinical characteristics of patients with ccRCC in this study.**

Related to Fig. 2.

| <b>Characteristics</b>          | <b>Total</b> | <b>No. (%)</b> |
|---------------------------------|--------------|----------------|
| <b>Patients</b>                 | 368          |                |
| <b>Age at diagnosis (years)</b> | 53 (4-83)    |                |
| <b>Gender</b>                   |              |                |
| Male                            | 247          | 67.1           |
| Female                          | 120          | 32.6           |
| unknown                         | 1            | 0.3            |
| <b>Fuhrman grading</b>          |              |                |
| 1                               | 43           | 11.7           |
| 2                               | 177          | 48.1           |
| 3                               | 55           | 15.0           |
| 4                               | 18           | 4.9            |
| unknow                          | 75           | 20.3           |
| <b>Necrosis</b>                 |              |                |
| No                              | 219          | 59.5           |
| Yes                             | 74           | 20.1           |
| unknow                          | 75           | 20.4           |
| <b>Vascular invasion</b>        |              |                |
| No                              | 269          | 73.1           |
| Yes                             | 24           | 6.5            |
| unknow                          | 75           | 20.4           |
| <b>T stage</b>                  |              |                |
| 1                               | 226          | 61.4           |
| 2                               | 85           | 23.1           |
| 3                               | 45           | 12.2           |
| 4                               | 12           | 3.3            |
| <b>Lymph nodes invasion</b>     |              |                |
| No                              | 341          | 92.7           |
| Yes                             | 26           | 7.1            |
| unknow                          | 1            | 0.2            |

**Appendix Table S2. Foldchange of LINC00493 binding proteins identified by SMIM26 RNA-pulldown SILAC MS. Related to Fig. 3.**

| <b>Protein Name</b> | <b>Rep.1</b> | <b>Rep.2</b> | <b>Rep.3</b> |
|---------------------|--------------|--------------|--------------|
| XRCC6               | 2.337        | 2.8154       | 3.1794       |
| CLH1                | 2.2705       | 3.144        | 3.7346       |
| RS18                | 1.89         | 2.3513       | 2.6375       |
| XRCC5               | 1.8035       | 2.3533       | 2.9547       |
| LMNA                | 1.7867       | 3.9632       | 3.4633       |
| PABPC4              | 1.6576       | 1.3157       | 1.269        |
| HS71B               | 1.6392       | 2.0548       | 1.8278       |
| HS71A               | 1.6392       | 2.0548       | 1.8278       |
| NPM                 | 1.5685       | 1.8711       | 1.5153       |
| BIP                 | 1.5416       | 1.473        | 1.9487       |
| RS4X                | 1.4576       | 1.6194       | 2.2548       |
| RS19                | 1.4279       | 1.6852       | 1.4967       |
| LAP2B               | 1.421        | 1.8893       | 2.3174       |
| HNRPU               | 1.4005       | 1.6404       | 1.3703       |
| TPM3                | 1.3792       | 1.7362       | 2.4368       |
| TPM4                | 1.3524       | 1.9048       | 2.13         |
| NCL                 | 1.3023       | 1.3931       | 1.3054       |
| EF1G                | 1.3013       | 1.7955       | 1.7815       |
| RS11                | 1.2657       | 1.9991       | 1.9762       |
| RS3A                | 1.2465       | 1.4409       | 1.7175       |
| RL8                 | 1.2359       | 1.2401       | 1.4344       |
| CH60                | 1.2309       | 1.3816       | 1.6673       |
| HNRPM               | 1.2196       | 1.3123       | 1.264        |
| HSP7C               | 1.2132       | 1.3312       | 1.2236       |
| RL7                 | 1.2001       | 1.565        | 1.8412       |



### Appendix Table S3. SMIM26 binding proteins identified by Co-IP MS

Related to Fig. 5.

| Proteins   |         |          |         |         |                 |          |         |
|------------|---------|----------|---------|---------|-----------------|----------|---------|
| ABCB7      | COPA    | FANCI    | MAGED2  | PDLIM5  | RPL18A          | SLC25A4  | TRIM27  |
| ABCD3      | COPB1   | FARSA    | MAGT1   | PDS5A   | RPL24           | SLC3A2   | TRIM28  |
| ABCF2      | COPB2   | FKBP8    | MAP1B   | PFKP    | RPL27A          | SMC2     | TRIP13  |
| ACAT1      | COPE    | GALK1    | MARS    | PHGDH   | RPL3            | SMC3     | TRIP6   |
| <b>AGK</b> | COPG2   | GANAB    | MBOAT7  | PPP6R3  | RPL30           | SMC4     | TUBB2B  |
| IFM1       | CSDA    | GCN1L1   | MCM3    | PRDX4   | RPL31           | SNRNP200 | TUBB6   |
| ALDH1B1    | CSE1L   | GEMIN4   | MCM7    | PRPF8   | RPL35A          | SNRNP40  | TUFM    |
| ANKHD1     | CYC1    | GEMIN5   | MDN1    | PRPS1   | RPL9            | SNRPD3   | U2AF2   |
| ARF4       | DARS    | HAX1     | MGST3   | PSMD3   | RPLP1           | SPTLC1   | UBAP2L  |
| ATP1A1     | DDOST   | HEATR2   | MMS19   | PTPLAD1 | RPN1            | SQSTM1   | UNC45A  |
| ATP2A2     | DDX20   | HNRNPA0  | MOV10   | QARS    | RPN2            | SRSF7    | UQCRC2  |
| ATP5L      | DDX21   | HNRNPF   | MSH6    | QSOX2   | RPS12           | SSR4     | USP10   |
| ATP5O      | DDX39B  | HSD17B12 | MTHFD1  | RALY    | RPS27           | STAU1    | VDAC2   |
| ATXN10     | DHCR7   | IARS     | MYBBP1A | RARS    | RPS28           | SURF4    | VDAC3   |
| BCLAF1     | DHX15   | IDH3A    | MYO1C   | RCC2    | RPS6            | TARDBP   | WDR61   |
| BYSL       | DNAJA1  | ILF2     | NCAPD2  | RCN1    | RPSA            | TARS2    | XPO1    |
| C1orf57    | DNAJA2  | IPO4     | NCLN    | RCN2    | SAMHD1          | TBC1D15  | XPO5    |
| CAD        | DNAJA3  | IPO7     | NDUFA13 | RFC3    | SAMM50          | TBCD     | XPO7    |
| CALU       | DNAJC11 | IPO8     | NDUFA5  | RFC4    | SCAMP3          | TCP1     | XPOT    |
| CAND1      | DRG1    | IPO9     | NDUFA9  | RFC5    | SCO2            | TELO2    | YME1L1  |
| CCDC47     | DSP     | IRAK1    | NDUFB10 | RHOT2   | SDF4            | TIMM44   | YTHDF2  |
| CCT3       | DYNC1H1 | KIFC1    | NOLC1   | RIC8A   | SEC13           | TIMM50   | YWHAQ   |
| CCT5       | ECM29   | KPNA2    | NPEPPS  | RNF114  | SFXN1           | TM9SF3   | ZC3HAV1 |
| CCT6A      | EEF2    | KPNB1    | NUP133  | RPL10   | SLC16A1         | TMEM33   | ZW10    |
| CCT7       | EFTUD2  | LARS     | NUP93   | RPL10A  | SLC1A5          | TNPO1    | SMIM26  |
| CDK1       | EIF5A   | LASP1    | OAT     | RPL12   | SLC25A10        | TNPO3    |         |
| CDK2       | EPRS    | LBR      | OCIAD2  | RPL13A  | <b>SLC25A11</b> | TOMM40   |         |
| CHCHD3     | EXOC5   | LRPPRC   | PCBP1   | RPL15   | SLC25A12        | TOP1     |         |
| CKAP5      | FAF2    | LRRC59   | PCBP2   | RPL17   | SLC25A13        | TRAFD1   |         |
| CNOT1      | FAM98A  | MAGED1   | PDK3    | RPL18   | SLC25A3         | TRIM25   |         |

**Appendix Table S4. SMIM26 binding proteins identified by SILAC-IP MS**

**Related to Fig. 5.**

| <b>proteins</b> | <b>H/L<br/>Ratio</b> | <b>L/H<br/>Ratio</b> | <b>proteins</b> | <b>H/L<br/>Ratio</b> | <b>L/H<br/>Ratio</b> | <b>proteins</b> | <b>H/L<br/>Ratio</b> | <b>L/H<br/>Ratio</b> |
|-----------------|----------------------|----------------------|-----------------|----------------------|----------------------|-----------------|----------------------|----------------------|
| CYC1            | 1.55                 | 1.56                 | FANCI           | 2.52                 | 2.17                 | SLC3A2          | 2.35                 | 3.00                 |
| RPN2            | 1.51                 | 1.58                 | HSD17B12        | 2.55                 | 2.18                 | ECM29           | 4.75                 | 3.04                 |
| C20orf4         | 1.98                 | 1.63                 | MDN1            | 4.60                 | 2.20                 | EMD             | 2.33                 | 3.07                 |
| EEF1G           | 1.58                 | 1.64                 | ZW10            | 1.83                 | 2.23                 | FAR1            | 2.25                 | 3.08                 |
| AFG3L2          | 2.36                 | 1.64                 | IPO9            | 5.81                 | 2.25                 | GCN1L1          | 4.59                 | 3.11                 |
| TUBA1C          | 2.11                 | 1.69                 | SEC16A          | 2.31                 | 2.26                 | ERLIN2          | 3.68                 | 3.23                 |
| TUBB6           | 3.08                 | 1.77                 | NUP93           | 1.82                 | 2.27                 | PPP6R3          | 2.87                 | 3.26                 |
| ESYT2           | 2.26                 | 1.79                 | UQCRC2          | 2.41                 | 2.27                 | IPO7            | 3.96                 | 3.30                 |
| RCN1            | 2.02                 | 1.81                 | TMEM165         | 4.41                 | 2.27                 | ATP2A2          | 3.78                 | 3.36                 |
| TNPO3           | 3.01                 | 1.81                 | SEC61A1         | 2.97                 | 2.28                 | TELO2           | 4.72                 | 3.44                 |
| NUP205          | 1.66                 | 1.81                 | NUP107          | 1.78                 | 2.29                 | SLC25A5         | 3.20                 | 3.53                 |
| MAGED2          | 2.37                 | 1.86                 | KPNB1           | 2.91                 | 2.31                 | PRKDC           | 4.25                 | 3.71                 |
| TIMM50          | 1.90                 | 1.92                 | PSMC2           | 1.82                 | 2.34                 | SLC25A1         | 4.55                 | 3.86                 |
| CSE1L           | 2.13                 | 1.93                 | IPO11           | 3.35                 | 2.40                 | TECR            | 4.82                 | 3.90                 |
| EXOC4           | 2.42                 | 1.95                 | SDF4            | 2.02                 | 2.42                 | TRAFD1          | 2.83                 | 3.99                 |
| TUBB            | 2.33                 | 1.97                 | OXA1L           | 1.69                 | 2.42                 | ATP1A1          | 4.05                 | 4.20                 |
| CAD             | 2.27                 | 1.98                 | DHCR7           | 3.97                 | 2.48                 | SLC25A10        | 3.31                 | 4.24                 |
| PPP6R1          | 2.12                 | 1.98                 | IRAK1           | 2.21                 | 2.55                 | <b>SLC25A11</b> | <b>6.29</b>          | <b>4.27</b>          |
| IPO5            | 2.87                 | 2.01                 | XPO5            | 2.38                 | 2.60                 | MON2            | 2.80                 | 4.34                 |
| <b>AGK</b>      | <b>1.81</b>          | <b>2.02</b>          | RCN2            | 3.56                 | 2.73                 | SLC25A3         | 4.87                 | 4.86                 |
| PHGDH           | 2.29                 | 2.03                 | SLC25A13        | 3.72                 | 2.78                 | XPOT            | 4.48                 | 5.49                 |
| AIFM1           | 2.52                 | 2.04                 | MMS19           | 4.55                 | 2.82                 | SLC16A1         | 10.13                | 6.08                 |
| RHOT2           | 2.61                 | 2.07                 | SLC1A5          | 2.08                 | 2.89                 | SMIM26          | 10.13                | 8.20                 |
| FADS2           | 1.57                 | 2.11                 | MAGED1          | 2.50                 | 2.94                 |                 |                      |                      |
| TRIP13          | 1.51                 | 2.15                 | XPO1            | 3.76                 | 2.99                 |                 |                      |                      |

**Appendix Table S5. SMIM26 binding proteins identified by GST-SMIM26 pulldown MS**

**Related to Fig. 5.**

| <b>Proteins</b> |          |          |            |         |          |
|-----------------|----------|----------|------------|---------|----------|
| KRT9            | YBX1     | ACADM    | NFS1       | SLC25A3 | SNAP47   |
| KRT1            | EEF1B2   | METTL15  | RUVBL2     | MAP2K7  | MAP2K2   |
| KRT2            | SMIM26   | TES      | SLC25A24   | GBAS    | RPL3     |
| KRT10           | TUBB6    | SLC16A1  | PYCR2      | PIP     | SSB      |
| HRNR            | CDK1     | HNRNPH1  | GCDH       | PREB    | EIF5A    |
| GST             | RUVBL1   | ALB      | SCAMP3     | DSG1    | DIRAS2   |
| <b>SLC25A11</b> | ATP5A1   | FLOT1    | EARS2      | DDOST   | SRSF8    |
| ACTB            | ATP5B    | DNAJA2   | HNRNPA1    | NONO    | SNRPA    |
| KRT6B           | PCNA     | EMD      | VAT1       | TRIP13  | TMPRSS13 |
| KRT6A           | DNAJA1   | KRT77    | DSC1       | PELO    | ABHD12   |
| TUBB4B          | KRT8     | KRT18    | HNRNPA0    | PRMT6   | GAPDH    |
| KRT5            | TUFM     | IDH2     | MAT2A      | AZGP1   | RPS7     |
| CBR1            | EEF1A1   | NIPSNAP1 | LANCL2     | KRT78   | EIF2S3   |
| KRT14           | PDK3     | RPL10A   | NDUFS2     | FAM98B  | EIF3F    |
| TUBB            | UQCRC2   | FLOT2    | ANXA2      | KPRP    | EEF1G    |
| TUBA1C          | EEF1A2   | ENO1     | OAT        | RPL5    |          |
| FLG2            | LANCL1   | CLPX     | DCD        | SFXN3   |          |
| GSTP1           | HNRNPF   | CYC1     | IGKC       | PSMA1   |          |
| KRT16           | SERPINH1 | RPL4     | <b>AGK</b> | PSMC5   |          |
| HSPB1           | PYCR1    | NDUFV1   | ACOT9      | RPL13   |          |

**Appendix Table S6. Sequences of primers, shRNAs, siRNAs.**

| Name                       | Sense sequence (5'-3')                                               | Antisense sequence (5'-3')                                        |
|----------------------------|----------------------------------------------------------------------|-------------------------------------------------------------------|
| qSMIM26                    | ACTATAGCCGGACAATGG<br>CG                                             | TGGGCGTTCAGAGAGTTCA<br>C                                          |
| qActin                     | ACGTGGACATCCGCAAAG                                                   | GACTCGTCATACTCCTGCTT<br>G                                         |
| qPABPC4                    | CTCTCGTGGCCTCCCTACT<br>A                                             | CAGCTGTCAGTCAGCCCTT<br>G                                          |
| qNCL                       | AAGCGTTGGAACACTCACTG<br>GT                                           | AAGTGTTCTCGCATCTCGCT                                              |
| GST-SMIM26<br>(pGEX-4T-1)  | GCGAATTCATGTATCGAA<br>ATGAGTTCACGG                                   | GCCTCGAGTCATGGTTCTGT<br>ACCAGGGCCACCAG                            |
| SMIM26-GFP<br>(pEGFP-N1)   | ATAAACTCGAGCTGCGA<br>GAATCGAGGCACTCG                                 | ATAAAAGAATTCGTGGTTC<br>TGTACCAGGGCCACCAG                          |
| SMIM26-flag<br>(pLVX-Puro) | GCGAATTCATGTATCGAA<br>ATGAGTTCACGG                                   | GCGGATCCTTACTTATCGTC<br>GTCATCCTTGTAATCTGGTT<br>CTGTACCAGGGCCAC   |
| SMIM26-Mut<br>(pLVX-Puro)  | GCGAATTCGGATATCGAA<br>ATGAGTTCACGG                                   | GCGGATCCAGCCTTATCGT<br>CGTCATCCTTGTAATCTGGT<br>TCTGTACCAGGGCCAC   |
| sh-SMIM26-#1<br>(pLKO.1)   | CCGGGATGGCTCAGCAAG<br>TGAAGTACTCGAGTACTT<br>CACTTGCTGAGCCATCTTT<br>T | AAAAGATGGCTCAGCAAGT<br>GAAGTACTCGAGTACTTCA<br>CTTGCTGAGCCATCCCGG  |
| sh-SMIM26-#2<br>(pLKO.1)   | CCGGGAAACAGTTGTCA<br>CATATAACTCGAGTTATA<br>TGTGACAACTGTTTCCTTT<br>TT | AAAAGGAAACAGTTGTCA<br>CATATAACTCGAGTTATAT<br>GTGACAACTGTTTCCCCGG  |
| HA-AGK<br>(pLVX-Puro)      | TCGAGCTCAAGCTTCGAA<br>TTCATGACGGTGTTCCTTA<br>AAACGCT                 | GTACCGTCGACTGCAGAAT<br>TCTCAGGCGTAGTCAGGCA<br>CGTCGTAAGGATACTGGGT |

|                                        |                                     |                                       |
|----------------------------------------|-------------------------------------|---------------------------------------|
|                                        |                                     | GGGGCTTGTGAGCAT                       |
| HA-AGK <sup>G126E</sup><br>(pLVX-Puro) | AGGAGATGAAACTGCA<br>GGAGGTTGTTACTGG | GCAGTGTTTCATCTCCTCCT<br>GCAACAATGATCA |
| si-SMIM26                              | CCAUGACUGGCUGCUGA<br>AU             | AUUCAGCAGCCAGUCAUG<br>G               |
| si-PABPC4-#1                           | GGGUCUGCCGCGAUAUG<br>AUTT           | AUCAUAUCGCGGCAGACCC<br>TT             |
| si-PABPC4-#2                           | GCUCCUCAAUGACCGCAA<br>ATT           | UUUGCGGUCAUUGAGGAG<br>CTT             |
| si-SLC25A11-#1                         | CCCGCCUUGGCAUCUAUA<br>CTT           | GUAUAGAUGCCAAGGCGG<br>GUA             |
| si-SLC25A11-#2                         | CAAUCCAAGCAGUUCUU<br>ACTT           | GUAAGAACUGCUUGGAUU<br>GGG             |
| si-SLC25A11-#3                         | GGUUUCUUCCUCUGCGG<br>UATT           | UACCGCAGAGGAAGAAAC<br>CTT             |
| si-NCL                                 | CCUGCCAAGAAGACAGU<br>UATT           | UAACUGUCUUCUUGGCAG<br>GTT             |
